# Supplementary material for: One-step thermolysis synthesis of two-dimensional ultrafine Fe3O4particles/carbon nanonetworks for high-performance lithium-ion batteries
Source: Royal Society of Chemistry journal article supplement (doi:10.1039/c5nr06843f), 2016-01-01
Supplement: c5nr06843f1.pdf [file c5nr06843f1.pdf]

## Supplementary Information

### **One-step thermolysis synthesis of two-dimensional ultrafine $\text{Fe}_3\text{O}_4$ particles/carbon nanonetworks for high-performance lithium-ion batteries**

Wanqun Zhang, \* Xiaona Li, Jianwen Liang, Kaibin Tang, Yongchun Zhu, Yitai Qian

School of Chemistry and Materials Science, University of Science and Technology of China, Hefei, 230026, P. R. China.

\* To whom correspondence should be addressed. Tel.& Fax: +86-0551-63601589

E-mail: wqz@ustc.edu.cn.

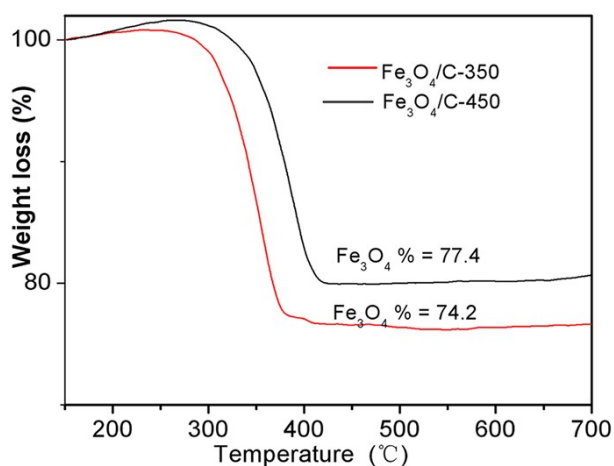

Figure S1. TGA results of  $\text{Fe}_3\text{O}_4/\text{C-350}$  and  $\text{Fe}_3\text{O}_4/\text{C-450}$ .

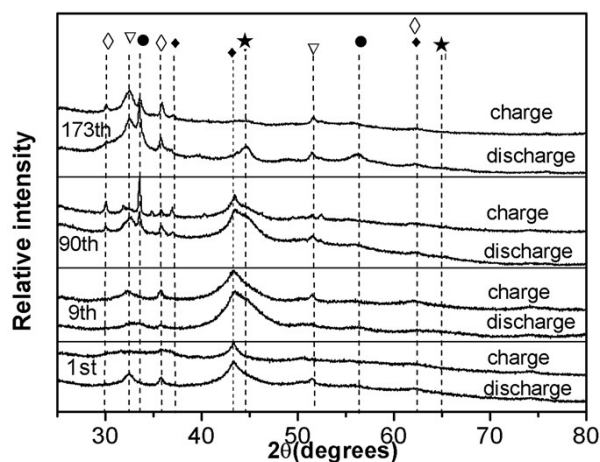

Figure S2. Comparison of powder XRD patterns of the lithiated and delithiated  $\text{Fe}_3\text{O}_4/\text{C-350}$  electrodes after 1, 9, 90 and 173 lithiation-delithiation cycles, respectively. The  $\star, \bullet, \blacklozenge, \diamond,$  and  $\nabla$  labels indicate the Fe (JCPDS card no. 065-4899),  $\text{Li}_2\text{O}$  (JCPDS no. 065-2972),  $\text{LiFeO}_2$  (JCPDS card no. 070-2711),  $\text{Fe}_3\text{O}_4$  (JCPDS card no. 076-0956) and  $\text{Fe}_2\text{O}_3$  (JCPDS card no. 052-1449), respectively.

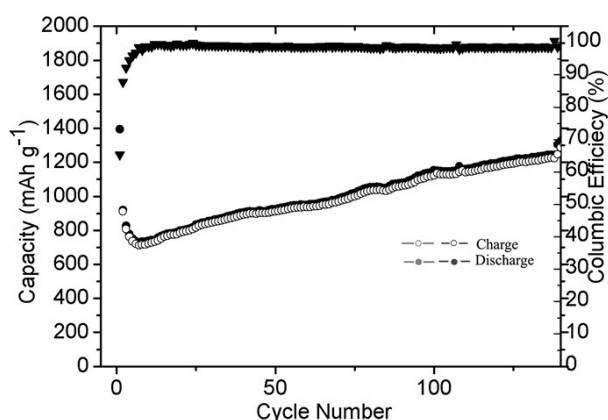

Figure S3. Capacity vs. cycle number curves and Coulombic efficiency of  $\text{Fe}_3\text{O}_4/\text{C-350}$  composites at the current of  $0.1 \text{ A g}^{-1}$ .

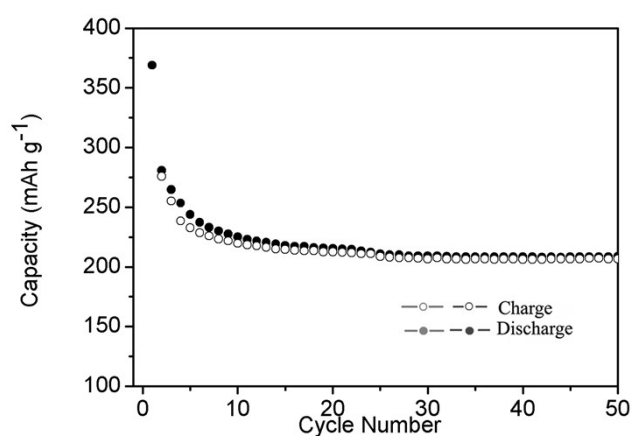

Figure S4. Reversible capacity and Coulombic efficiency of  $\text{Fe}_3\text{O}_4/\text{C-350}$  composites at  $1 \text{ A g}^{-1}$  after  $\text{Fe}_3\text{O}_4$  was dissolved in HCl

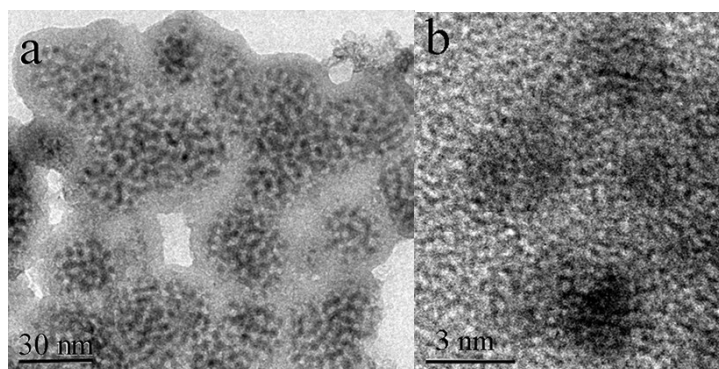

Figure S5. TEM and HRTEM images of  $\text{Fe}_3\text{O}_4/\text{C}$ -350 composite electrode after 500 electrochemical cycles at the current of  $1 \text{ A g}^{-1}$ .

**Table. S1** A comparison of electrochemical performance of the  $\text{Fe}_3\text{O}_4/\text{C}$ -350 electrode with recent studies on  $\text{Fe}_3\text{O}_4/\text{carbon}$  composites. (Composition of the all compared electrodes: 80 wt % active material, 10 wt % acetylene black, and 10 wt % PVDF binder dissolved in NMP)

| Material                                               | $\text{Fe}_3\text{O}_4$<br>(wt %) | Reversible<br>capacity/ $\text{m Ah g}^{-1}$ | Rate | Ref.         |
|--------------------------------------------------------|-----------------------------------|----------------------------------------------|------|--------------|
| $\text{Fe}_3\text{O}_4/\text{C}$ nanonetworks          | 77.4                              | 1534/500th cycle                             | 1 C  | This<br>work |
|                                                        |                                   | 845/500th cycle                              | 5 C  |              |
|                                                        |                                   | 647/500th cycle                              | 10 C |              |
| $\text{Fe}_3\text{O}_4$ nanoparticles/graphene         | 80.4                              | 830/10th cycle                               | 1 C  | 42           |
| $\text{Fe}_3\text{O}_4/\text{Graphene}$                | -                                 | 1260/250th cycle                             | 1 C  | 44           |
| $\text{Fe}_3\text{O}_4$ nanoflakes /NC                 | 56                                | 662/500th cycle                              | 1 C  | 17           |
|                                                        |                                   | 600/200th cycle                              | 5 C  |              |
| Fe/ $\text{Fe}_3\text{O}_4$ /NC                        | 24                                | 293/5th cycle                                | 1 C  | 50           |
|                                                        |                                   | 116/5th cycle                                | 10 C |              |
| Graphene/ $\text{Fe}_3\text{O}_4$<br>nanoparticles/C   | 61.8                              | 1048/20th cycle                              | 1 C  | 52           |
|                                                        |                                   | 405/20th cycle                               | 5 C  |              |
|                                                        |                                   | 227/20th cycle                               | 10 C |              |
| A Foamlike $\text{Fe}_3\text{O}_4/\text{C}$            | 46.4                              | 580/10th cycle                               | 5 C  | 21           |
| $\text{Fe}_3\text{O}_4/\text{grapheme}$                | 87.1                              | 540/10th cycle                               | 1 C  | 59           |
| $\text{Fe}_3\text{O}_4/\text{mesoporous carbon}$       | 41.57                             | 670/100th cycle                              | 1 C  | 60           |
| $\text{Fe}_3\text{O}_4/\text{FC}$                      | 83.5                              | 620/10th cycle                               | 1 C  | 30           |
| $\text{Fe}_3\text{O}_4/\text{C}$ nanospheres           | 62.64                             | 784/50th cycle                               | 1 C  | 34           |
| $\text{Fe}_3\text{O}_4/\text{C}$                       | 55.24                             | 834/60th cycle                               | 1 C  | 35           |
|                                                        |                                   | 588/50th cycle                               | 5 C  |              |
|                                                        |                                   | 382/50th cycle                               | 10 C |              |
| $\text{Fe}_3\text{O}_4/\text{C}/\text{PGC}$ nanosheets | 68.7                              | 998/100th cycle                              | 1 C  | 9            |
|                                                        |                                   | 858/350th cycle                              | 5 C  |              |
|                                                        |                                   | 587/10th cycle                               | 10 C |              |
| $\text{Fe}_3\text{O}_4/\text{grapheme}$                | 73.65                             | 982/10th cycle                               | 1 C  | 67           |
